# Supplementary material for: The seasonal investigation of Symbiodiniaceae in broadcast spawning, Acropora humilis and brooding, Pocillopora cf. damicornis corals
Source: PeerJ. 2022 Jun 14;10:e13114. doi: 10.7717/peerj.13114 (PMC9205303; doi:10.7717/peerj.13114)
Supplement: Supplemental Information 4 [file peerj-10-13114-s004.xlsx]

## Sheet: Number of read
	Table 1. Number of sequencing reads of two coral species, Acropora humilis and Pocillopora cf. damicornis
	Raw sequencing reads			Adaptor and quality (QV>20) trimmed reads		Chimera removed reads
	Sample name	Number of reads	Basepair	Number of reads	Basepair	Number of reads	Basepair
1	H1W	47441	14279741	11478	1947181	7428	1307363
2	H17W	14248	4288648	11073	2948691	8285	2190609
3	H18W	23794	7161994	3237	853682	2021	514935
4	H21W	61009	18363709	14452	2402757	9405	1605057
5	H22W	53691	16160991	3367	683557	2141	454210
6	H23W	28624	8615824	17192	4703638	12708	3423383
7	H26W	18731	5638031	14829	4046182	11081	2977284
8	H29W	23884	7189084	19468	5276333	14589	3899601
9	H33W	22335	6722835	7967	1495170	5305	1029367
10	H36W	25699	7735399	14329	3310923	10254	2406651
11	H39W	32145	9675645	19413	5030232	14438	3720675
12	H40W	24602	7405202	17768	4697091	13385	3482496
13	H41W	50223	15117123	26459	6545697	19119	4775202
14	H42W	42872	12904472	15372	3553919	10892	2568500
15	H1S	55128	16593528	21564	4726288	15298	3425330
16	H2S	66063	19884963	15823	3004212	10616	2090239
17	H17S	33759	10161459	13962	2933853	9358	2048810
18	H18S	21733	6541633	18297	4951440	13638	3641961
19	H21S	25773	7757673	19961	5407397	15010	4013735
20	H23S	30221	9096521	21856	5784323	16397	4306406
21	H26S	60105	18091605	40887	10964942	31092	8212507
22	H22S	36620	11022620	28299	7677471	21352	5716847
23	H29S	48182	14502782	33556	9034691	25199	6691789
24	H33S	45050	13560050	37562	10044629	28256	7483939
25	H36S	26938	8108338	9871	2530301	7336	1852651
26	H39S	58223	17525123	39005	10200276	29811	7655321
27	H40S	80945	24364445	59643	16296323	44658	12032921
28	H41S	57126	17194926	30941	8275268	23242	6132599
29	H42S	45400	13665400	27378	7242234	20739	5419740
30	H1R	78174	23530374	13575	2726321	8875	1845620
31	H2R	100368	30210768	14402	2626610	9036	1726772
32	H17R	59692	17967292	13684	3100771	9535	2216944
33	H18R	40252	12115852	12826	3496450	9523	2553336
34	H21R	54700	16464700	6061	1584133	4396	1147131
35	H23R	62455	18798955	5427	1305026	3800	909284
36	H26R	50667	15250767	11872	3205460	8842	2358137
37	H33R	51292	15438892	26255	7155896	19771	5314779
38	H36R	42123	12679023	26764	7306123	20226	5447614
39	H39R	36107	10868207	9599	2513613	7934	2077974
40	H40R	32083	9656983	11601	2719234	8394	1992177
41	H41R	39178	11792578	30130	8277499	22354	6059870
42	H42R	25988	7822388	12041	3248994	9179	2465329
43	P1W	21202	6381802	16561	4350560	13221	3503659
44	P2W	25747	7749847	16174	4407559	13312	3654994
45	P3W	44676	13447476	32650	8930007	28697	7914975
46	P4W	24115	7258615	14790	4004256	12471	3411344
47	P5W	42978	12936378	23903	5127479	16141	3617469
48	P6W	32277	9715377	20753	5659519	17635	4850806
49	P7W	28471	8569771	13499	3619107	11003	2980971
50	P8W	40335	12140835	17437	4597553	14282	3817475
51	P9W	37365	11246865	22057	5982091	18311	5010525
52	P10W	31417	9456517	13188	3061935	10418	2546145
53	P11W	150236	45221036	38044	5833403	23646	3786854
54	P12W	75223	22642123	19014	3185108	12190	2166872
55	P13W	28399	8548099	13512	3611335	11174	3020831
56	P2S	23859	7181559	10622	2879405	8782	2402841
57	P4S	24518	7379918	9590	2471323	6380	1684756
58	P5S	61910	18634910	5518	1195594	4127	966166
59	P6S	40462	12179062	9429	2567281	7357	2013112
60	P7S	17374	5229574	7227	1957527	5945	1624573
61	P10S	23918	7199318	10891	2650057	8932	2277031
62	P11S	28292	8515892	14630	3466353	11696	2901682
63	P12S	43872	13205472	13511	3661541	11077	3022632
64	P13S	17093	5144993	15038	4086504	12746	3485571
65	P14S	26855	8083355	15583	4257072	13110	3604201
66	P15S	26136	7866936	11492	2534580	8968	2095410
67	P1R	22528	6780928	17663	4700763	15043	4047777
68	P2R	8447	2542547	4903	1257045	2988	787641
69	P3R	37277	11220377	11556	3017479	9424	2508691
70	P4R	42754	12868954	17193	4649094	14181	3866757
71	P5R	39993	12037893	6841	1804964	4137	1075173
72	P7R	39228	11807628	15848	4201533	13385	3602215
73	P8R	83470	25124470	33943	9248546	28214	7733221
74	P9R	31806	9573606	21784	5988784	16741	4605267
75	P10R	50832	15300432	25269	6771414	22179	6054805
76	P11R	60605	18242105	40764	11108890	35069	9648551
77	P12R	58542	17621142	32784	8507673	27527	7275830
78	P13R	73086	21998886	25768	5522079	19434	4414419
79	P14R	69393	20887293	13214	3584973	10304	2810021
80	P15R	82364	24791564	26743	6520973	22155	5643216

## Sheet: Shannon and Simpson
	Table 2. Alpha diversity indicies of of two coral species, Acropora humilis and Pocillopora cf. damicornis
	Sample name	Corals	Season	Shannon	Simpson
1	H17R	Acropora humilis	rainy	1.1158	0.575407
2	H17S	Acropora humilis	summer	1.0157	0.551922
3	H17W	Acropora humilis	winter	0.982981	0.540816
4	H18R	Acropora humilis	rainy	1.11381	0.574876
5	H18S	Acropora humilis	summer	1.00479	0.550593
6	H18W	Acropora humilis	winter	1.27236	0.643098
7	H1R	Acropora humilis	rainy	1.04299	0.561623
8	H1S	Acropora humilis	summer	1.02206	0.572051
9	H1W	Acropora humilis	winter	1.05386	0.582167
10	H21R	Acropora humilis	rainy	0.979774	0.524593
11	H21S	Acropora humilis	summer	1.02683	0.555263
12	H21W	Acropora humilis	winter	1.08594	0.578045
13	H22S	Acropora humilis	summer	1.01066	0.543153
14	H22W	Acropora humilis	winter	1.15598	0.596164
15	H23R	Acropora humilis	rainy	1.04583	0.556103
16	H23S	Acropora humilis	summer	0.993846	0.549431
17	H23W	Acropora humilis	winter	0.991637	0.535462
18	H26R	Acropora humilis	rainy	1.00067	0.548156
19	H26S	Acropora humilis	summer	0.993417	0.552111
20	H26W	Acropora humilis	winter	1.0188	0.548758
21	H29S	Acropora humilis	summer	1.01749	0.549204
22	H29W	Acropora humilis	winter	1.02439	0.556263
23	H2R	Acropora humilis	rainy	0.996069	0.539924
24	H2S	Acropora humilis	summer	1.08441	0.57526
25	H33R	Acropora humilis	rainy	1.02079	0.547857
26	H33S	Acropora humilis	summer	1.00352	0.552765
27	H33W	Acropora humilis	winter	1.10536	0.585507
28	H36R	Acropora humilis	rainy	1.01841	0.546752
29	H36S	Acropora humilis	summer	1.11739	0.59372
30	H36W	Acropora humilis	winter	1.00971	0.556104
31	H39R	Acropora humilis	rainy	1.56071	0.733521
32	H39S	Acropora humilis	summer	1.00499	0.572405
33	H39W	Acropora humilis	winter	1.05632	0.577519
34	H40R	Acropora humilis	rainy	1.14554	0.607443
35	H40S	Acropora humilis	summer	1.00712	0.547669
36	H40W	Acropora humilis	winter	1.02241	0.576495
37	H41R	Acropora humilis	rainy	0.993378	0.542204
38	H41S	Acropora humilis	summer	0.988552	0.543633
39	H41W	Acropora humilis	winter	1.0229	0.552204
40	H42R	Acropora humilis	rainy	1.0509	0.54839
41	H42S	Acropora humilis	summer	1.01946	0.572843
42	H42W	Acropora humilis	winter	1.0775	0.57075
43	P10R	Pocillopora damicornis	rainy	0.218141	0.0846229
44	P10S	Pocillopora damicornis	summer	0.305042	0.118184
45	P10W	Pocillopora damicornis	winter	0.273889	0.107473
46	P11R	Pocillopora damicornis	rainy	0.179339	0.0680705
47	P11S	Pocillopora damicornis	summer	0.184836	0.0709287
48	P11W	Pocillopora damicornis	winter	0.250001	0.0972985
49	P12R	Pocillopora damicornis	rainy	0.213117	0.0825683
50	P12S	Pocillopora damicornis	summer	0.247488	0.0898523
51	P12W	Pocillopora damicornis	winter	0.290453	0.124491
52	P13R	Pocillopora damicornis	rainy	0.2073	0.0844517
53	P13S	Pocillopora damicornis	summer	0.232677	0.0857248
54	P13W	Pocillopora damicornis	winter	0.269044	0.100753
55	P14R	Pocillopora damicornis	rainy	0.201352	0.0770059
56	P14S	Pocillopora damicornis	summer	0.178907	0.0671793
57	P15R	Pocillopora damicornis	rainy	0.245124	0.0994191
58	P15S	Pocillopora damicornis	summer	0.291663	0.115641
59	P1R	Pocillopora damicornis	rainy	0.191714	0.0767446
60	P1W	Pocillopora damicornis	winter	0.217276	0.0884055
61	P2R	Pocillopora damicornis	rainy	0.412121	0.157035
62	P2S	Pocillopora damicornis	summer	0.196294	0.0711503
63	P2W	Pocillopora damicornis	winter	0.161133	0.0605177
64	P3R	Pocillopora damicornis	rainy	0.220203	0.0856742
65	P3W	Pocillopora damicornis	winter	0.236893	0.085752
66	P4R	Pocillopora damicornis	rainy	0.194368	0.0698129
67	P4S	Pocillopora damicornis	summer	0.262885	0.100156
68	P4W	Pocillopora damicornis	winter	0.273989	0.0982937
69	P5R	Pocillopora damicornis	rainy	0.241633	0.0969664
70	P5S	Pocillopora damicornis	summer	0.283386	0.105903
71	P5W	Pocillopora damicornis	winter	0.298734	0.12154
72	P6S	Pocillopora damicornis	summer	0.169756	0.0614277
73	P6W	Pocillopora damicornis	winter	0.392729	0.140479
74	P7R	Pocillopora damicornis	rainy	0.229413	0.0916205
75	P7S	Pocillopora damicornis	summer	0.227694	0.0821586
76	P7W	Pocillopora damicornis	winter	0.240173	0.0885463
77	P8R	Pocillopora damicornis	rainy	0.166047	0.0643186
78	P8W	Pocillopora damicornis	winter	0.225691	0.0819993
79	P9R	Pocillopora damicornis	rainy	0.203798	0.0756767
80	P9W	Pocillopora damicornis	winter	0.190559	0.0711838
